# Supplementary material
Source: publisher site journal article supplement (https://www.dovepress.com/article/277171)
Supplement: Supplementary file 1 [file get_supplementary_file.php]

**Supplementary Material**

Assessment of Age-induced Changes in Body Fat Percentage and BMI Aided by Bayesian Modelling: A Cross-Sectional Cohort Study in Middle-aged and Older Adults

**
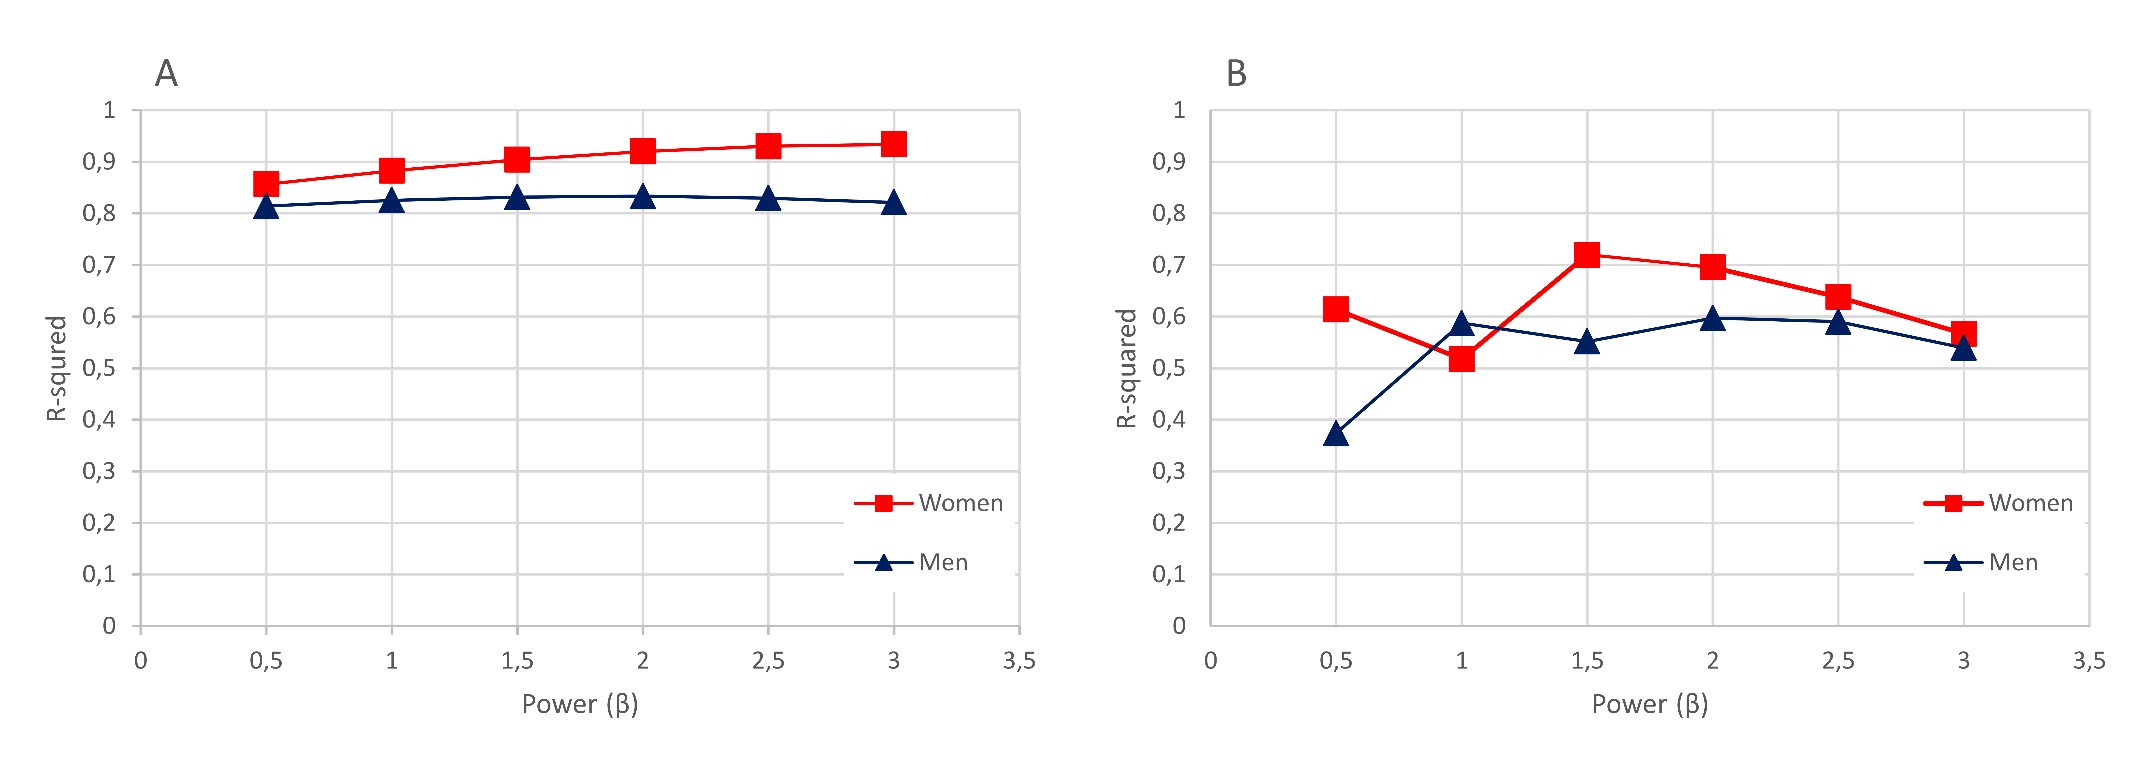
**

**Figure S1** R-squared versus power (β), when BMI is regressed against FM/heightβ or FFM/heightβ. Values of β were varied from 0.5 to 3.0 in the increments of 0.5. (**A**) fat mass index; (**B**) fat-free mass index.

**Table S1** Significant differences in anthropometric measures in the age-gender groups.

| Age group | Gender | BF | FM | FMI | FFM | FFMI | BMI |
| --- | --- | --- | --- | --- | --- | --- | --- |
| (%) | (kg) | (kg/m2) | (kg) | (kg/m2) | (kg/m2) |
| 40-44y | Men | 24.77±5.70 | 22.5±8.59 | 7.14±2.78 | 66.03±6.72 | 20.89±1.52 | 28.03±3.94 |
| Women | 33.08±6.75**a** | 23.59±9.03 | 8.86±3.19**a** | 45.33±4.16**a** | 17.15±1.47**a** | 26.01±4.37**b** |
| 45-49y | Men | 25.53±6.56 | 22.98±8.91 | 7.38±2.84 | 64.43±7.25 | 20.65±1.85 | 28.03±4.12 |
| Women | 32.83±6.38**a** | 22.91±8.11**a** | 8.69±3.00**a** | 45.02±4.32**a** | 17.12±1.64**a** | 25.81±4.20**b** |
| 50-54y | Men | 25.87±6.04 | 22.52±7.86 | 7.35±2.58 | 62.59±6.86 | 20.38±1.74 | 27.73±3.70 |
| Women | 34.81±6.36**a** | 24.96±8.75**a** | 9.64±3.32**a** | 44.82±4.37**a** | 17.37±1.70**a** | 27.01±4.62**b** |
| 55-59y | Men | 27.06±5.88 | 23.6±7.95 | 7.90±2.67 | 61.68±6.72 | 20.60±1.74 | 28.49±3.87 |
| Women | 36.13±6.46**a** | 26.20±8.69**a** | 10.32±3.36**a** | 44.48±4.32**a** | 17.57±1.71**a** | 27.89±4.64**b** |
| 60-64y | Men | 27.94±6.08 | 24.2±8.18 | 8.22±2.74 | 60.67±6.32 | 20.62±1.74 | 28.84±3.66 |
| Women | 37.43±5.77**a** | 27.46±8.39**a** | 10.95±3.24**a** | 44.39±4.56**a** | 17.74±1.77**a** | 28.69±4.57 |

**Notes:** Data are presented as mean ± standard deviation. a*P*<0.001; b*P*<0.01 significantly different from men.

**Abbreviations:** BF, body fat; FM, fat mass; FMI, fat mass index; FFM, fat-free mass; FFMI, fat-free mass index; BMI, body mass index.

**Table S2** Significant differences of anthropometric measures across respective age groups, separately for men and women.

| Variables | 40-44y | 45-49y | 50-54y | 55-59y | 60-64y | *P* |
| --- | --- | --- | --- | --- | --- | --- |
| Men |  |  |  |  |  |  |
| BF (%)**c** | 24.77±5.70 | 25.53±6.56 | 25.87±6.04 | 27.06±5.88 | 27.94±6.08 | <0.001 |
| FM (kg)**e** | 22.5±8.59 | 22.98±8.91 | 22.52±7.86 | 23.6±7.95 | 24.2±8.18 | <0.05 |
| FMI (kg/m2)**c** | 7.14±2.78 | 7.38±2.84 | 7.35±2.58 | 7.90±2.67 | 8.22±2.74 | <0.001 |
| FFM (kg)a | 66.03±6.72 | 64.43±7.25 | 62.59±6.86 | 61.68±6.72 | 60.67±6.32 | <0.001 |
| FFMI (kg/m2) | 20.89±1.52 | 20.65±1.85 | 20.38±1.74 | 20.60±1.74 | 20.62±1.74 | >0.05 |
| BMI (kg/m2)**d** | 28.03±3.94 | 28.03±4.12 | 27.73±3.70 | 28.49±3.87 | 28.84±3.66 | <0.001 |
| Women |  |  |  |  |  |  |
| BF (%)**a** | 33.08±6.75 | 32.83±6.38 | 34.81±6.36 | 36.13±6.46 | 37.43±5.77 | <0.001 |
| FM (kg)**b** | 23.59±9.03 | 22.91±8.11 | 24.96±8.75 | 26.20±8.69 | 27.46±8.39 | <0.001 |
| FMI (kg/m2)**a** | 8.86±3.19 | 8.69±3.00 | 9.64±3.32 | 10.32±3.36 | 10.95±3.24 | <0.001 |
| FFM (kg) | 45.33±4.16 | 45.02±4.32 | 44.82±4.37 | 44.48±4.32 | 44.39±4.56 | <0.05 |
| FFMI (kg/m2)**b** | 17.15±1.47 | 17.12±1.64 | 17.37±1.70 | 17.57±1.71 | 17.74±1.77 | <0.001 |
| BMI (kg/m2)**b** | 26.01±4.37 | 25.81±4.20 | 27.01±4.62 | 27.89±4.64 | 28.69±4.57 | <0.001 |

**Notes:** Data are presented as mean ± standard deviation. aSignificant differences across respective age groups (except the 45-49y age group); bSignificant differences across respective age groups (except the 45-49y and 50-54y age groups); cSignificant differences within the 40-44y, 45-49y, 50-54y group cluster, and the 55-59y, 60-64y age groups; dSignificant differences between the 45-49y and 60-64y age groups, and the 50-54y and 55-59y, 60-64y age group cluster; eSignificant differences between the 50-54y, and 60-64y age groups.

**Abbreviations:** BF, body fat; FM, fat mass; FMI, fat mass index; FFM, fat-free mass; FFMI, fat-free mass index; BMI, body mass index.

**Table S3** Sensitivity analysis. Means and 95% credible intervals of anticipated BF% relative to BMI cut-offs, stratified by age and gender.

| Age/gender | BMI = 18.5 kg/m2 | BMI = 25.0 kg/m2 | BMI = 30.0 kg/m2 |
| --- | --- | --- | --- |
| Men |  |  |  |
| 40 y | 13.0 (9.4, 16.7) | 21.3 (17.4, 25.2) | 27.6 (23.5, 31.7) |
| 45 y | 13.4 (9.6, 17.2) | 21.6 (17.6, 25.7) | 27.9 (23.8, 32.2) |
| 50 y | 13.8 (9.9, 17.7) | 22.0 (17.9, 26.2) | 28.3 (24.0, 32.7) |
| 55 y | 14.1 (10.1, 18.2) | 22.4 (18.1, 26.7) | 28.7 (24.2, 33.2) |
| 60 y | 14.5 (10.3, 18.7) | 22.7 (18.3, 27.2) | 29.0 (24.5, 33.7) |
| 65 y | 14.9 (10.6, 19.2) | 23.1 (18.6, 27.7) | 29.4 (24.7, 34.2) |
| Women |  |  |  |
| 40 y | 23.3 (19.6, 27.0) | 31.5 (27.6, 35.4) | 37.8 (33.7, 41.9) |
| 45 y | 23.6 (19.9, 27.5) | 31.8 (27.8, 35.9) | 38.2 (34.0, 42.4) |
| 50 y | 24.0 (20.1, 28.0) | 32.2 (28.1, 36.4) | 38.5 (34.2, 42.9) |
| 55 y | 24.4 (20.3, 28.5) | 32.6 (28.3, 36.9) | 38.9 (34.5, 43.4) |
| 60 y | 24.7 (20.6, 28.9) | 32.9 (28.5, 37.4) | 39.3 (34.7, 43.9) |
| 65 y | 25.1 (20.8, 29.4) | 33.3 (28.8, 37.9) | 39.6 (34.9, 44.4) |

**Abbreviations:** BMI, body mass index.
